# Supplementary material for: A cationic azobenzene-surfactant-modified graphene hybrid: unique photoresponse and electrochemical behavior
Source: Royal Society of Chemistry journal article supplement (doi:10.1039/c5nr04646g), 2015-01-01
Supplement: c5nr04646g1.pdf [file c5nr04646g1.pdf]

## Supporting information

### An Cationic Azobenzene-Surfactant-Modified Graphene Hybrid: Unique Photoresponse and Electrochemical Behavior

Shu Chen, Lin Bao, Encai Ou, Chang Peng, Weimao Wang, Weijian Xu\*

School of Chemistry and Chemical Engineering, Hunan University, Hunan 410082,  
P.R. China

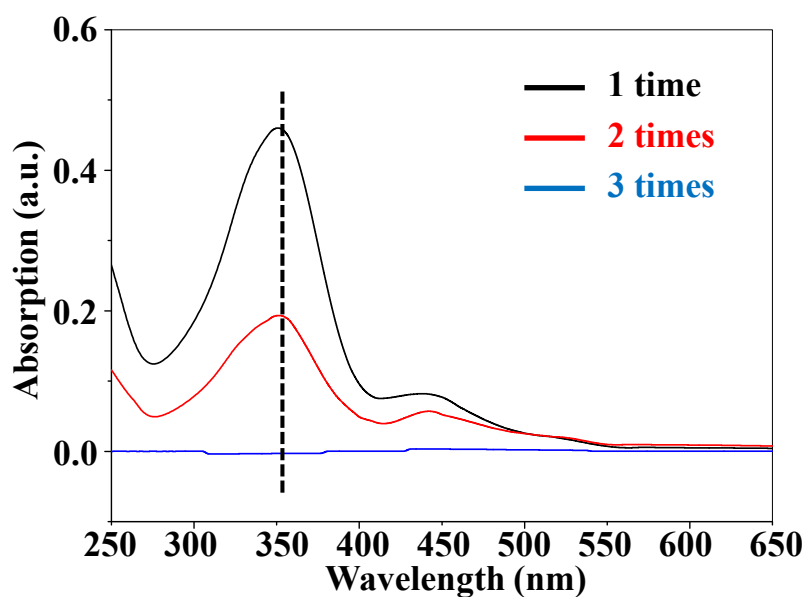

**Figure (S1)** UV-Vis spectra of the filtrate AzoC<sub>7</sub>NO solution after different washing times with 100 mL deionized water

The grafting degree of Azo-GO can be calculated from the XPS, using the Eq. (S1) as follows, where C is atomic ratios, I is the atomic integration area of XPS, SF is the atomic sensitivity factors.

$$C_E = \frac{I_E}{SF_E} / \left( \sum_{x=1}^N \frac{I_x}{SF_x} \right) \quad (\text{S1})$$

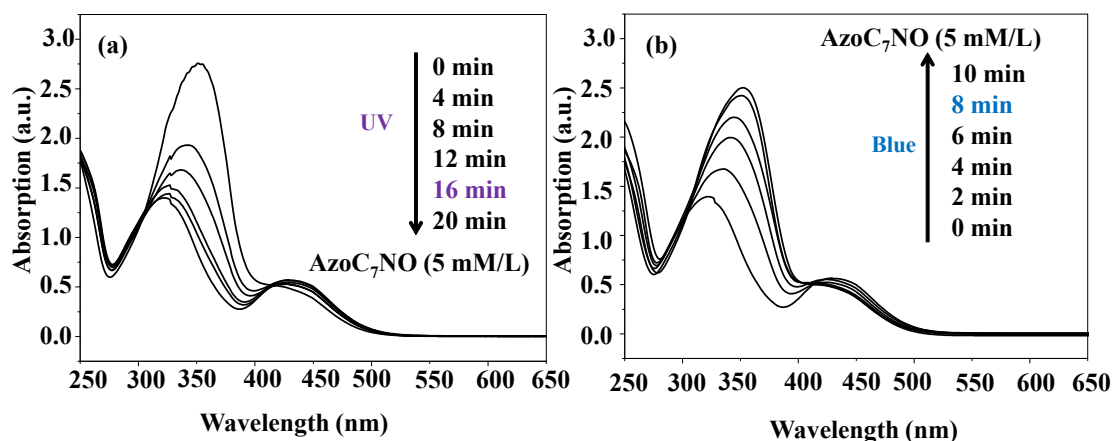

**Figure (S2)** UV-Vis spectra of (a) AzoC<sub>7</sub>NO (5 mM/L) upon UV light irradiation for different times, (b) UV light irradiated AzoC<sub>7</sub>NO (5 mM/L) upon blue light irradiation for different times

**Table (S1)** light irradiated times of the photostationary balance at different concentrations of Azo-GO

| Azo-GO    | Balance time of UV irradiation | Balance time of Blue irradiation |
|-----------|--------------------------------|----------------------------------|
| 0.5 mg/mL | 25 min                         | 12 min                           |
| 1.0 mg/mL | 45 min                         | 22 min                           |
| 1.5 mg/mL | 80 min                         | 35 min                           |

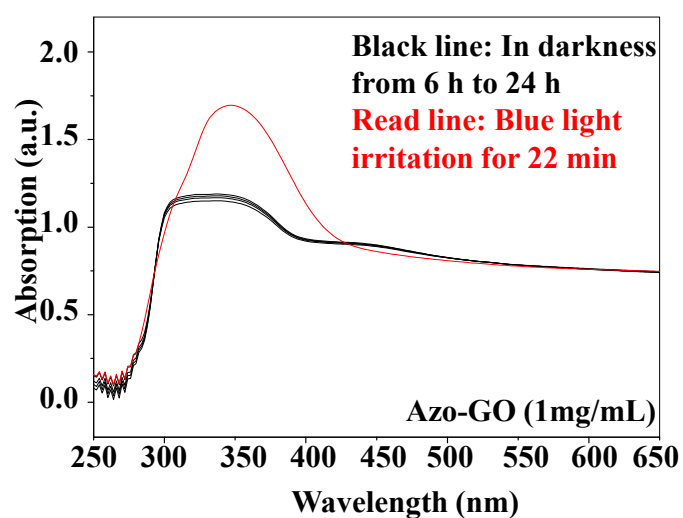

**Figure (S3)** UV-Vis spectra of UV light irradiated Azo-GO (1 mg/mL) in darkness from 6 h to 24 h

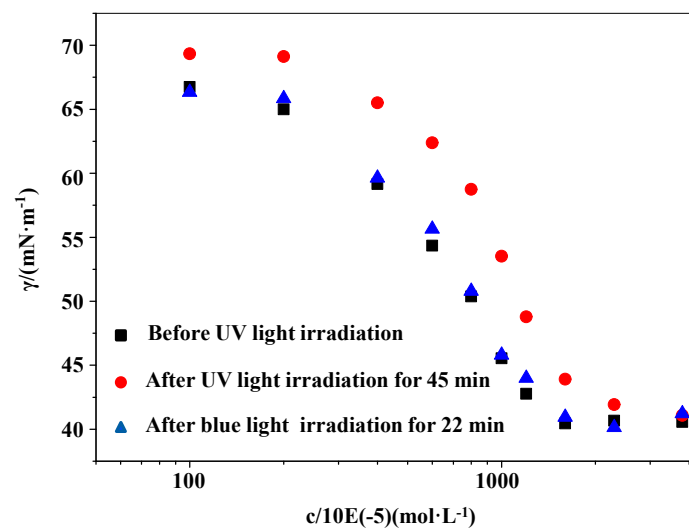

**Figure (S4)** The curves of surface tension against the concentrations of AzoC<sub>7</sub>NO before and after light irradiation at room temperature
